# Electrophysiological network alterations in adults with copy number variants associated with high neurodevelopmental risk

Diana C. Dima<sup>1,2\*</sup>, Rachael Adams<sup>1,3</sup>, Stefanie C. Linden<sup>2,3,4</sup>, Alister Baird<sup>3</sup>, Jacqueline Smith<sup>3,4</sup>, Sonya Foley<sup>1</sup>, Gavin Perry<sup>1</sup>, Bethany C. Routley<sup>1</sup>, Lorenzo Magazzini<sup>1</sup>, Mark Drakesmith<sup>1,2</sup>, Nigel Williams<sup>2,3,4</sup>, Joanne Doherty<sup>1,3,4</sup>, Marianne B.M. van den Bree<sup>2,3,4</sup>, Michael J. Owen<sup>2,3,4</sup>, Jeremy Hall<sup>2,3,4</sup>, David E. J. Linden<sup>1,2,3,4,5</sup>, and Krish D. Singh<sup>1</sup>

## Author affiliations:

<sup>1</sup> Cardiff University Brain Research Imaging Centre (CUBRIC), School of Psychology, Cardiff University, Maindy Road, Cardiff, CF24 4HQ, United Kingdom

<sup>2</sup> Neuroscience and Mental Health Research Institute (NMHRI), Cardiff University, Maindy Road, Cardiff, CF24 4HQ, United Kingdom

<sup>3</sup> Division of Psychological Medicine and Clinical Neurosciences, School of Medicine, Cardiff University, Cardiff, CF24 4HQ, UK

<sup>4</sup> MRC Centre for Neuropsychiatric Genetics and Genomics, School of Medicine, Cardiff University, Maindy Road, Cardiff, CF24 4HQ, United Kingdom

<sup>5</sup> School of Mental Health and Neuroscience, Faculty of Health, Medicine and Life Sciences, Maastricht University, Maastricht, The Netherlands

\*Corresponding author: [DimaDC@cardiff.ac.uk](mailto:DimaDC@cardiff.ac.uk)

## Abstract

Rare copy number variants associated with increased risk for neurodevelopmental and psychiatric disorders (referred to as ND-CNVs) are characterized by heterogeneous phenotypes thought to share a considerable degree of overlap. Altered neural integration has often been linked to psychopathology and is a candidate marker for potential convergent mechanisms through which ND-CNVs modify risk; however, the rarity of ND-CNVs means that few studies have assessed their neural correlates. Here, we used magnetoencephalography (MEG) to investigate resting-state oscillatory connectivity in a cohort of 42 adults with ND-CNVs, including deletions or duplications at 22q11.2, 15q11.2, 15q13.3, 16p11.2, 17q12, 1q21.1, 3q29, and 2p16.3, and 42 controls. We observed decreased connectivity between occipital, temporal and parietal areas in participants with ND-CNVs. This pattern was common across genotypes and not exclusively characteristic of 22q11.2 deletions, which were present in a third of our cohort. Furthermore, a data-driven graph theory framework enabled us to successfully distinguish participants with ND-CNVs from unaffected controls using differences in node centrality and network segregation. Together, our results point to alterations in electrophysiological connectivity as a putative common mechanism through which genetic factors confer increased risk for neurodevelopmental and psychiatric disorders.

## 1 Introduction

2 A number of rare genetic variants occurring through the deletion or duplication of  
3 chromosomal segments are associated with significantly increased risk for a range of  
4 neurodevelopmental disorders (ND), including schizophrenia, autism spectrum disorder  
5 (ASD), and developmental delay<sup>1</sup>. Although the underlying mechanisms remain poorly  
6 understood, these copy number variants (referred to hereafter as ND-CNVs) are thought to  
7 increase the risk for psychopathology through alterations in neural structure and function. Thus,  
8 neuroimaging studies in participants with ND-CNVs provide a unique opportunity to study  
9 intermediate phenotypes of mental disorders.

10 Furthermore, recent work suggests that CNV-specific phenotypic outcomes are limited,  
11 pointing instead to a large degree of similarity across phenotypes associated with different ND-  
12 CNVs<sup>2,3</sup>. Focusing on convergent neural alterations across different genotypes can thus help  
13 elucidate the mechanisms linking ND-CNVs at different loci to a shared psychopathology and  
14 increase in neurodevelopmental risk.

15 Failures of functional neural integration have long been considered a hallmark of  
16 neurodevelopmental disorders such as schizophrenia<sup>4,5</sup>. In recent years, evidence of disrupted  
17 connectivity has also emerged in ASD populations<sup>6,7</sup> and has been shown to transcend  
18 diagnostic boundaries<sup>8</sup>. ND-CNVs are thought to increase disorder risk by acting on large-scale  
19 neural integration through molecular and cellular mechanisms<sup>9</sup>. Studying functional network  
20 alterations in participants with ND-CNVs could thus help establish their reliability as  
21 biomarkers of neurodevelopmental risk. Synchronous oscillatory activity thought to support  
22 communication between brain areas is of particular interest as a window into excitatory and  
23 inhibitory mechanisms, and can be measured at rest using electro- and magneto-  
24 encephalography (EEG/MEG).

25 However, the rarity of ND-CNVs means that evidence of their functional connectivity  
26 correlates is scarce. Of the genetic imaging studies conducted so far, most have focused on the  
27 22q11.2 deletion syndrome (also known as DiGeorge or velo-cardio-facial syndrome). This  
28 deletion is associated with a number of physical phenotype manifestations such as congenital  
29 cardiac malformations, as well as high risk for psychopathology, and has long been recognised  
30 as a discrete syndrome<sup>10-13</sup>. The presence of a 22q11.2 deletion has been linked to alterations  
31 in brain structure and function<sup>14-17</sup>, including disrupted structural connectivity<sup>18,19</sup>. Although  
32 fewer studies have investigated functional connectivity, they report similarly disrupted  
33 networks using functional MRI<sup>20-22</sup> and EEG<sup>23</sup>.

34 Despite emerging evidence of white matter alterations associated with other ND-CNVs<sup>24-26</sup>,  
35 very few studies have investigated their functional correlates. Recent electrophysiological  
36 research reported increased beta-band activity in participants with 15q11.2-q13.1  
37 duplications<sup>27,28</sup> and 16p11.2 deletions<sup>29</sup>, as well as delayed evoked responses in the latter<sup>24,30</sup>.  
38 Based on current evidence it is difficult to assess the extent and specificity of functional  
39 connectivity alterations, especially for rarer ND-CNVs.

40 To address this, we investigated oscillatory connectivity measured with MEG in participants  
41 with ND-CNVs at nine different loci. Given the common phenotypic outcomes associated with  
42 ND-CNVs<sup>2</sup>, this approach can identify convergent endophenotypes of potentially higher  
43 clinical relevance. Because a third of participants had 22q11.2 deletions (a sample size twice  
44 as large as any other genotype in our cohort), we also assessed alterations in connectivity

45 separately in this subgroup and in the group of participants with other ND-CNVs. This allowed  
46 us to directly assess the specificity of the effects, especially considering previous findings of  
47 widespread neural alterations associated with 22q11.2 deletions.

48 In both subgroups, we found evidence of disrupted alpha and beta-band oscillatory connectivity  
49 in posterior brain regions. Furthermore, using graph theory measures of network topology and  
50 information transfer, we were able to identify participants with ND-CNVs based on their  
51 individual connectivity maps. The two approaches highlighted common patterns of  
52 dysconnectivity in participants with ND-CNVs, as well as specific network features that might  
53 be linked to CNV pathogenicity.

## 54 **Methods**

### 55 **Participants**

56 MEG data were acquired in 42 adults with ND-CNVs targeted for their high penetrance for  
57 neurodevelopmental disorders (22 female; mean age  $38.5 \pm 12.5$  years). ND-CNVs at nine  
58 different loci were represented in the cohort, with 14 (33%) participants carrying 22q11.2  
59 deletions. Demographic and clinical information for this cohort are provided in the  
60 Supplementary Information (Supplementary Table 1).

61 Recruitment was performed through NHS genetics clinics and relevant support groups within  
62 the UK. Written consent was obtained in accordance with The Code of Ethics of the World  
63 Medical Association (Declaration of Helsinki), and all procedures were approved by the South  
64 East Wales Research Ethics Committee.

65 Controls were selected among resting-state datasets acquired at CUBRIC as part of the “100  
66 Brains” and “UK MEG Partnership” projects. These cohorts included healthy participants  
67 aged 18-65 with no history of neurological or neuropsychiatric disorders, and 42 controls were  
68 chosen to match the gender and age of the ND-CNV carriers as closely as possible (22 female;  
69 mean age  $33.3 \pm 9.6$  years). These measurements were acquired under protocols approved by  
70 the Cardiff University School of Psychology Ethics Committee.

71 Since a third of the ND-CNV cohort consisted of participants with 22q11.2 deletions, we  
72 assessed the impact of this subgroup by repeating all analyses on (1) participants with other  
73 ND-CNVs (except 22q11.2 deletions) and their matched controls ( $N = 56$ ), and (2) participants  
74 with 22q11.2 deletions and their matched controls ( $N = 28$ ).

### 75 **Genotyping**

76 Participants with ND-CNVs were genotyped using the Illumina HumanCoreExome whole  
77 genome SNP array, which contained an additional 27,000 genetic variants at loci previously  
78 linked to neurodevelopmental disorders, including CNVs. The raw intensity data was  
79 processed using Illumina Genome Studio software (version 2011.1). PennCNV (version 1.0.3)  
80 was used to perform CNV calling in order to confirm the presence of the ND-CNV in each  
81 case sample, with each CNV being required to span a minimum of 10 informative SNPs and to  
82 be at least 10 kb in length. CNV coordinates were specified according to genome version hg19,  
83 and the boundaries of each CNV were confirmed by manually inspecting the Log R ratio and  
84 B allele frequency plots at each of the genomic regions of interest (Supplementary Table 1).  
85 Genetic information was not available for control participants; given the rarity of these  
86 genotypes in the general population, they were assumed to carry no ND-CNVs.

## 87 **Data collection**

88 Five-minute resting-state MEG recordings were made using a 275-channel CTF radial  
89 gradiometer system (CTF, Vancouver, Canada) at a sampling rate of 1200 Hz. Three of the  
90 sensors were turned off due to excessive noise, and 29 reference channels were recorded to  
91 improve noise cancellation<sup>31</sup>. During the recordings, participants were seated upright and  
92 fixated their eyes on a red fixation point presented centrally on either a CRT monitor or LCD  
93 projector. Three electromagnetic coils were placed at fiducial locations (nasion and pre-  
94 auricular) for head localization.

95 To aid in source localization, structural T1-weighted MRI scans were also acquired using a 3T  
96 General Electric or Siemens MRI scanner with a 1 mm isotropic FSPGR/MPRAGE pulse  
97 sequence.

## 98 **Data analysis**

### 99 **Pre-processing**

100 To remove muscle artifacts, a semi-automatic procedure was implemented using the FieldTrip  
101 toolbox<sup>32</sup> and MATLAB R2015a. Sensor time-series were bandpass-filtered between 110 and  
102 140 Hz and z-transformed; segments exceeding a participant-specific z-score threshold were  
103 removed. Next, eye movement and cardiac artifacts were projected out of the data using  
104 Independent Component Analysis (ICA). Noisy channels exhibiting high variance were also  
105 removed from the data where necessary. There was no significant difference in recording  
106 duration after artifact rejection between the ND-CNV and control groups ( $t(81.8) = 1.61$ ,  $P =$   
107  $0.11$ , mean duration  $255.88 \pm 29.31$  s and  $245.33 \pm 30.86$  s respectively).

108 Head motion was monitored continuously in 18/42 ND-CNV datasets and 40/42 control  
109 datasets, and head localization was performed at the start and end of the recording in the  
110 remaining datasets. There was no significant difference between the ND-CNV and control  
111 groups in maximum head coil displacement between the beginning and end of the recording  
112 ( $t(79.8) = 0.85$ ,  $P = 0.39$ , mean displacement  $2.07 \pm 3.62$  mm and  $2.7 \pm 3.06$  mm respectively).  
113 In datasets with continuous head localization, the maximum distance of the head coils from  
114 their average position across the entire recording did not significantly differ between groups  
115 ( $t(39.4) = 1.44$ ,  $P = 0.16$ , mean distance  $4.74 \pm 3.5$  mm and  $3.21 \pm 4.2$  mm respectively).

116 Prior to source localization, coregistration was performed by manually marking head coil  
117 locations on each participant's MRI using FieldTrip. The data were downsampled to 600 Hz  
118 and bandpass-filtered in six different frequency bands: delta (2-4 Hz), theta (4-8 Hz), alpha (8-  
119 13 Hz), beta (13-30 Hz), low gamma (40-60 Hz), and high gamma (60-90 Hz).

### 120 **Estimating functional connectivity**

121 To assess group differences in resting-state connectivity (Figure 1), we focused on amplitude-  
122 amplitude coupling of source-localized oscillatory signals<sup>33</sup>. Continuous data in each of the six  
123 frequency bands were projected into source space using a Linearly Constrained Minimum  
124 Variance (LCMV) beamformer. Sources were reconstructed on a 6 mm template grid warped  
125 to each participant's MRI, using a multiple local-spheres forward model<sup>34</sup>. To alleviate the  
126 depth bias, beamformer weights were normalized by their vector norm<sup>35</sup>.

127 Next, 90 nodes corresponding to cortical regions of interest (ROI) in the Automated  
128 Anatomical Labelling (AAL) atlas<sup>36</sup> were identified by performing a frequency analysis on all  
129 sources within each ROI and selecting the source with the largest temporal standard deviation.

130 Continuous virtual sensor timecourses corresponding to the 90 nodes were then reconstructed  
131 and bandpass-filtered into the frequency bands of interest.

132 To avoid spurious correlations, the node time-series were orthogonalized using a multivariate  
133 symmetric orthogonalization approach<sup>37</sup>. A Hilbert transform was used to calculate oscillatory  
134 amplitude envelopes, which were then despiked using a median filter, downsampled to 1 Hz,  
135 and trimmed to avoid filter and edge effects. To obtain connectivity matrices, pairwise  
136 correlations were calculated between the 90 Hilbert envelopes. Next, a Fisher transform was  
137 applied to obtain z-scores with zero mean and unit variance across connections in each  
138 participant's map. This procedure corrected for possible systematic differences across  
139 participants, for example due to differences in data quality<sup>38</sup>.

140 Intracranial volume (ICV), quantified as the number of 1-mm isotropic voxels inside the brain,  
141 was smaller in the ND-CNV group than the control group ( $t(65.5) = -2.19, P = 0.03$ ), in line  
142 with some previous reports<sup>39-41</sup>. The potential impact of this difference on the MEG results  
143 was alleviated through the source localization procedure and the z-scoring of the connectivity  
144 matrices.

145 In addition to the six frequency bands listed above, a combined measure of connectivity was  
146 obtained by calculating the vector-sum of connectivity matrices across all frequency bands<sup>42</sup>.

#### 147 **Group differences in resting-state connectivity**

148 To reduce the impact of noise, a conservative ranking procedure<sup>42</sup> was used to threshold the  
149 connectivity maps for the purposes of between-group comparisons. This consisted of  
150 calculating the rank of each connection in participant-level connectivity matrices and averaging  
151 the resulting rank map across participants in each group. Only the top 20% edges in the average  
152 rank map were considered "valid" and selected for further analysis. To ensure that large  
153 differences in signal across cohorts were not discarded by this procedure, the rank-thresholding  
154 procedure was performed separately in each cohort, and connections determined as "valid" in  
155 either cohort were included in further analysis.

156 To assess differences between groups, Welch's t-tests were conducted at each valid edge.  
157 Significant edges were identified using an uncorrected  $\alpha = 0.05$ . Correction for multiple  
158 comparisons was applied using a randomization procedure with 10000 sign-shuffling iterations  
159 and maximal statistic thresholding (omnibus  $\alpha = 0.05$ )<sup>43</sup>.

160 Furthermore, the robustness of cohort differences was evaluated through a resampling  
161 procedure. Increases and decreases in connectivity between groups were tabulated using  
162 random samples of half of each group. This was repeated across 10000 iterations, and edges  
163 showing a consistent effect direction across at least 95% of iterations were considered robust.



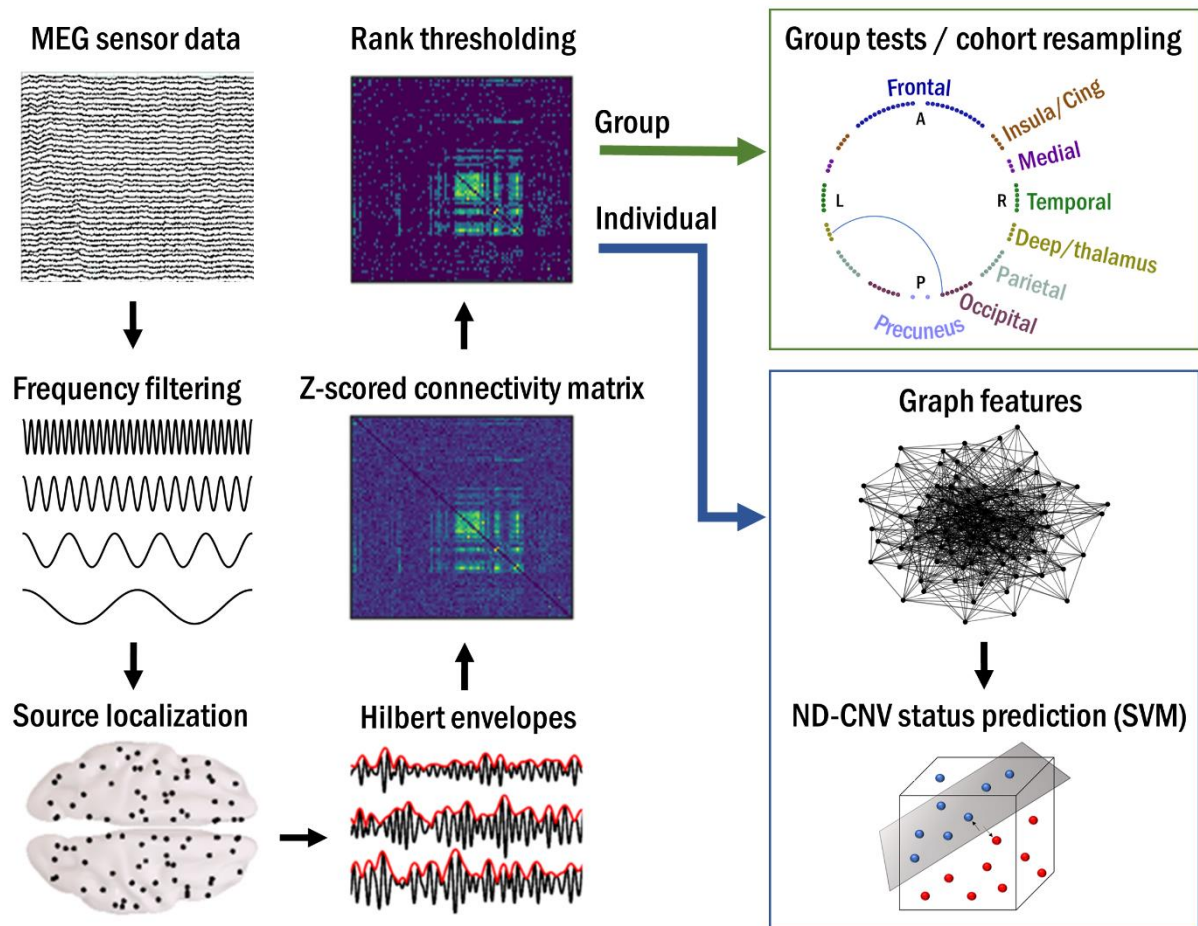

**Figure 1.** Overview of the analysis pipeline. Resting-state MEG data were preprocessed, filtered into six frequency bands, and projected into source space. Hilbert envelopes were calculated at 90 AAL-atlas-based virtual sensor locations, and correlated to obtain functional connectivity matrices. These were z-scored and rank-thresholded at the group level for between-group analyses, and at the subject level for data-driven prediction of ND-CNV status using graph theory. See Supplementary Figure 1 for the full list of node labels corresponding to the circular plots in this paper.

164 To control for potential confounds (for example, resulting from imperfect age matching  
 165 between the ND-CNV and control groups), an additional multiple regression analysis was  
 166 performed. Combined-frequency connectivity matrices were entered as response variables with  
 167 a categorical predictor (ND-CNV presence) and three covariates (age, gender, and ICV). A  
 168 resampling procedure as described above was performed to assess the robustness of between-  
 169 group differences. The sign of the regression slope associated with the main predictor was  
 170 tabulated across 1000 split-half cohort randomizations. Edges showing consistent effects  
 171 across 95% of iterations were considered robust.

### 172 **Individual networks: identifying participants with ND-CNVs using graph theory**

173 Next, a data-driven graph theory approach was used to assess whether participants with ND-  
 174 CNVs could be distinguished from unaffected controls using functional connectivity features.  
 175 To this aim, the cohort was divided into training and test sets using an iterated cross-validation  
 176 procedure.

177 This analysis focused on individual networks by selecting the top 20% of connections in each  
 178 participant's normalized connectivity map as the basis for undirected graphs. Networks were

179 then characterized using six nodal graph theory metrics chosen to capture node connectedness,  
180 network integration, and network modularity (Supplementary Table 2). All graph theory  
181 analyses were performed using MATLAB R2019a and the Brain Connectivity Toolbox<sup>44</sup>.

182 To discriminate between groups, a linear support vector machine (SVM) classifier<sup>45</sup> was  
183 trained on each of the node metrics. Additionally, a pooled feature vector was created by  
184 combining the six metrics to maximize the amount of complementary information input to the  
185 classifier. This approach makes use of information across all nodes while avoiding the need for  
186 multiple testing.

187 Classification was performed between the ND-CNV and control groups, as well as between the  
188 two ND-CNV subgroups (22q11.2 deletions and other ND-CNVs) and their matched controls.  
189 To avoid overfitting, model performance was evaluated using 100 iterations of stratified five-  
190 fold cross-validation. This entailed iteratively leaving out a fifth of the data for testing and  
191 training the model on the remaining data, whilst ensuring balanced group representation in each  
192 fold. Performance was quantified using accuracy (proportion correctly classified observations),  
193 sensitivity (true positive rate) and specificity (true negative rate) in order to highlight any  
194 asymmetries in ND-CNV and control identification. Furthermore, significance was assessed  
195 by shuffling the true labels 5000 times and recomputing classifier accuracy to estimate the  
196 empirical chance level and calculate a one-tailed p-value<sup>43</sup>.

## 197 **Results**

### 198 **Connectivity alterations associated with ND-CNVs**

199 The analysis of group differences in oscillatory connectivity revealed the largest number of  
200 valid connections in the alpha and beta bands (Figure 2). Most of the significantly different  
201 connections showed a decrease in oscillatory connectivity between posterior, parietal and  
202 temporal nodes in the ND-CNV group, with the exception of a few right-hemisphere edges.  
203 More extensive cohort effects were detected using the combined frequency maps (61 edges  
204 exceeded the uncorrected threshold, compared to 1, 28 and 42 in the theta, alpha and beta  
205 bands). These patterns were robust to random sub-sampling of the cohort, suggesting that they  
206 were not driven by individual subjects. A small number of left-hemisphere connections,  
207 including the precuneus, early visual cortex, and parietal regions, survived omnibus correction  
208 for multiple comparisons.

209 Importantly, a similar pattern of hypoconnectivity was observed even after excluding  
210 participants with 22q11.2 deletions and their matched controls (Figure 2B-C). Both ND-CNV  
211 subgroups showed decreased posterior connectivity (Figure 3; Supplementary Figure 1),  
212 indicating that the overall pattern was not driven by the 22q11.2 deletion group. On the other  
213 hand, participants with 22q11.2 deletions exhibited more right-hemisphere hyperconnectivity  
214 compared to controls. These effects spanned the precuneus and parietal cortex, as well as  
215 frontal regions, suggesting some overlap with the default mode network (DMN).

216 To ensure that these differences were not affected by potential confounds, the cohort  
217 resampling tests on combined frequency maps were repeated as a multiple linear regression  
218 with age, gender and ICV as covariates. This analysis revealed fewer connections (65 compared  
219 to the original 92 in the whole cohort analysis), but largely similar patterns of dysconnectivity  
220 (Figure 3).



221 Furthermore, although IQ scores could not be included in this analysis because they were not  
 222 available for the control group, IQ scores in the ND-CNV group correlated with connectivity  
 223 strength at only four edges (Supplementary Figure 2).

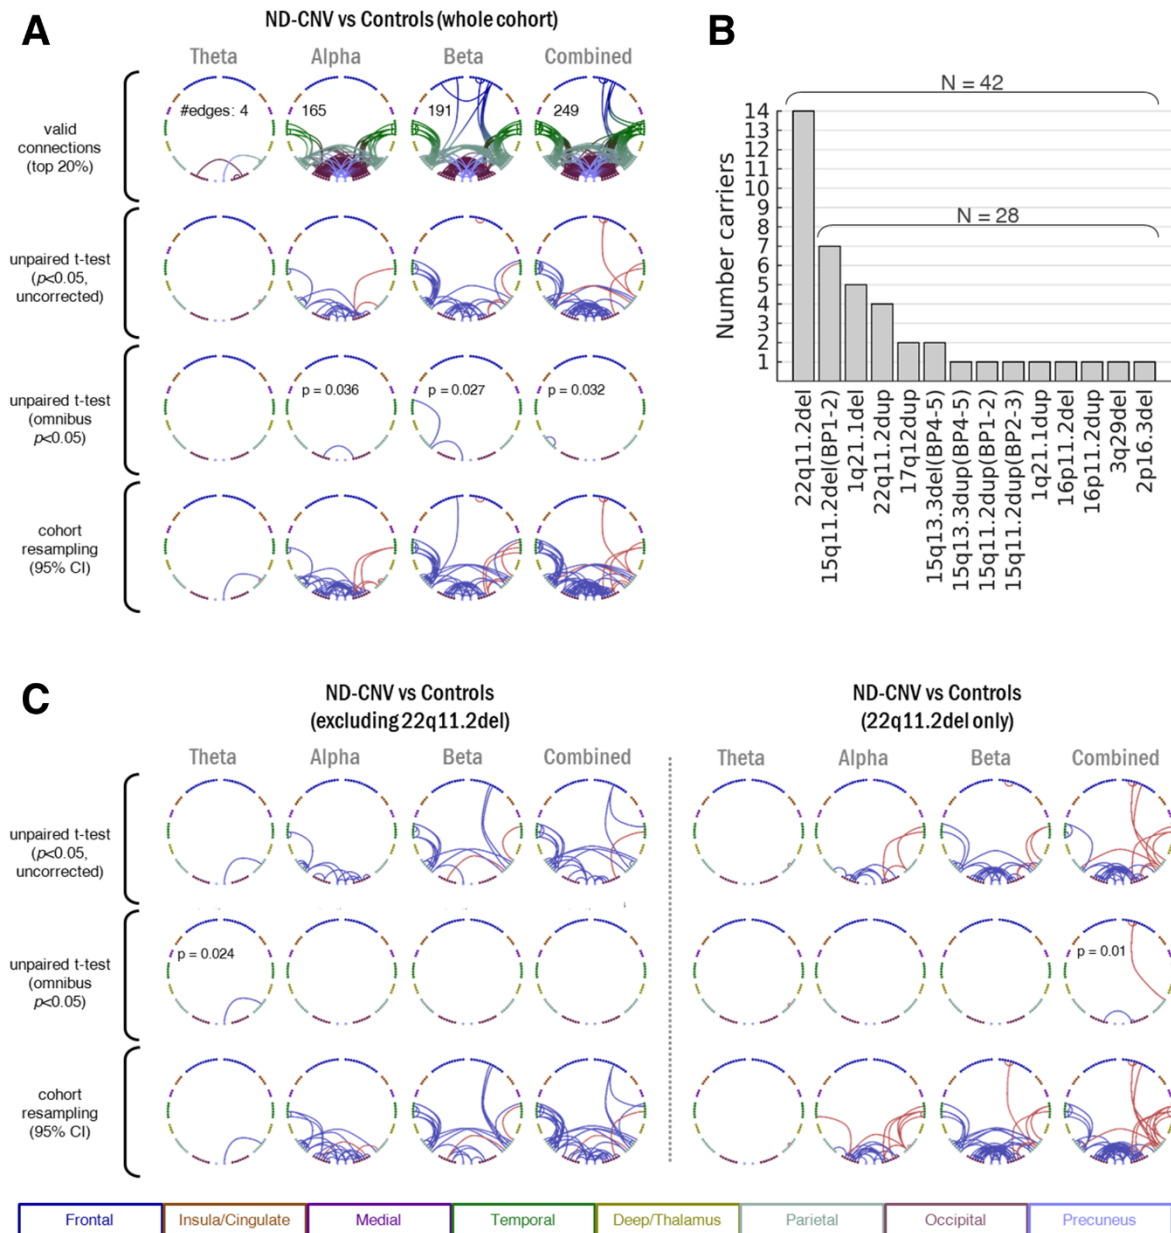

**Figure 2. A.** Differences in resting-state connectivity (amplitude correlations) between participants with ND-CNVs and controls. Connectivity increases and decreases in the ND-CNV group are shown in red and blue respectively. The rows show (top to bottom): valid connections after mean-rank thresholding in each frequency band; uncorrected ( $P < 0.05$ ) differences between groups; multiple comparison-corrected (omnibus  $P < 0.05$ ) differences between groups; and connections showing consistent increases/decreases in 95% of cohort resampling iterations. **B.** Frequency of deletions (del) and duplications (dup) at each locus in the ND-CNV group. **C.** As in A, for subgroups excluding participants with 22q11.2 deletions and their matched controls (left) or including only participants with 22q11.2 deletions and their matched controls (right). To facilitate comparison, “valid” connections were the same as in A. Only frequency bands with surviving “valid” connections are shown.

## 224 Network features as predictors of ND-CNV status

225 A graph theory framework was employed to identify participants with ND-CNVs from their  
226 functional networks based on combined frequency maps. This approach has the advantage of  
227 reducing dimensionality and complements the edge-focused group testing approach described  
228 above. Despite methodological differences between the two analyses, a visualization of the  
229 nodal graph theory features shows overlap with the nodes highlighted in the group analysis  
230 (Supplementary Figures 3-6).

231 Graph theory metrics were successful predictors of ND-CNV participants relative to unaffected  
232 controls. The best prediction accuracy was achieved by combining the 6 node features  
233 (Supplementary Table 3; Figure 4A; maximum accuracy  $71\% \pm 3.44$ ,  $P=0.0002$ ). However,  
234 participants with 22q11.2 deletions were more consistently correctly classified than those with  
235 other ND-CNVs (Figure 4B).

236 This was confirmed by subgroup classification analyses, which also pointed to subgroup  
237 differences. When excluding participants with 22q11.2 deletions, the best decoding accuracies  
238 were achieved using node eccentricities ( $65.62\% \pm 3.91$ ,  $P=0.0016$ ), node degrees, and the joint  
239 feature model. On the other hand, all node features were successful in discriminating  
240 participants with 22q11.2 deletions from their matched controls, with the best performance  
241 obtained using the clustering coefficient ( $87.61\% \pm 4.95$ ,  $P=0.0002$ ).

242 These results point to commonalities in network features (such as decreased centrality) that  
243 allow for the successful classification of participants with ND-CNVs across distinct genotypes.  
244 On the other hand, the features are specific enough to allow successful discrimination between  
245 participants with 22q11.2 deletions and other ND-CNVs (Supplementary Table 3). Given the  
246 higher overall burden of 22q11.2 deletions in neurodevelopmental disorders<sup>1</sup>, this suggests that  
247 increased neurodevelopmental risk may be associated with more salient alterations in network  
248 function and may underpin specific genotype effects.

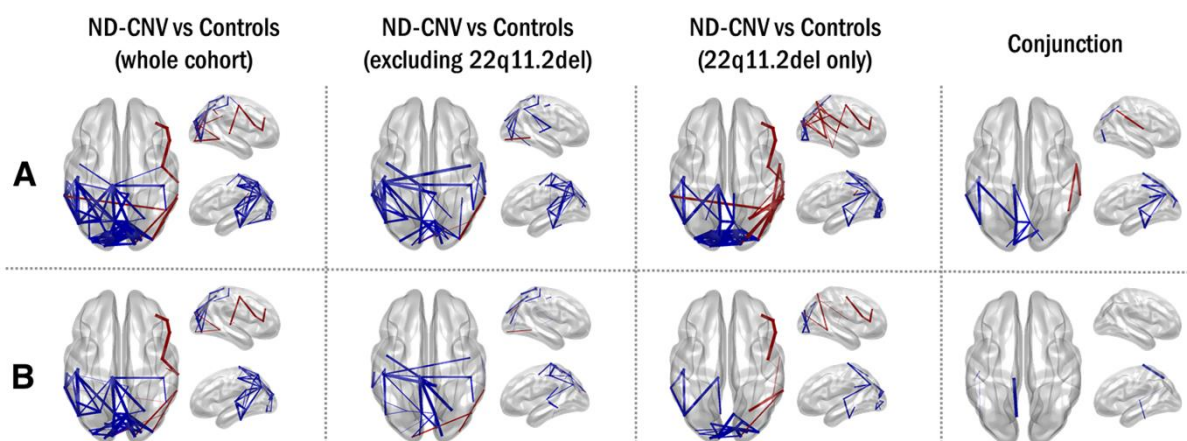

**Figure 3.** Differences in connectivity are not driven by age, gender, and intracranial volume. Connections meeting the 95% confidence criterion in the cohort resampling test are displayed for all group tests (first three columns). The last column shows supra-threshold connections in both the 22q11.2 deletion group and the other ND-CNV group; they are shown in blue where they are decreased in both groups, and in red where they have opposite signs. Line width increases with effect robustness. **A.** Connections exhibiting robust differences based on the cohort resampling test of combined frequency matrices, plotted on the template brain. **B.** As in A, after including age, gender and intracranial volume as covariates in a multiple linear regression with “ND-CNV presence” as a main categorical predictor.

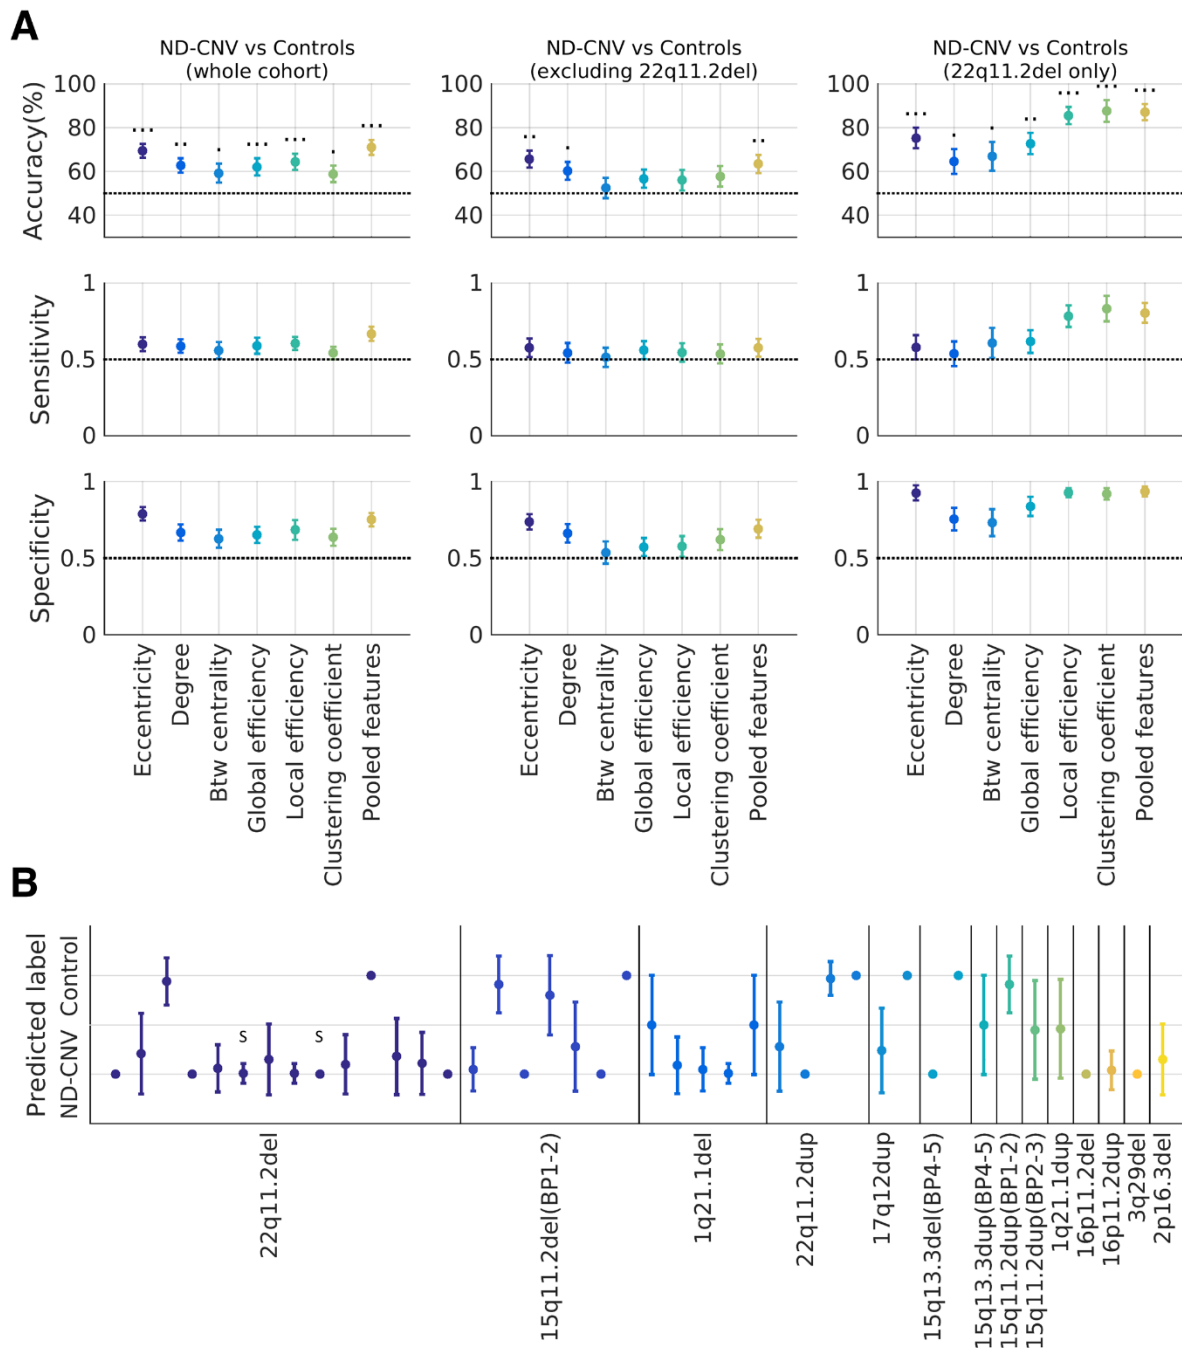

**Figure 4.** Classifying participants with ND-CNVs and unaffected controls from individual MEG functional networks using graph theory. **A:** Classification performance on the three groups, using different metrics to characterize the networks (eccentricity, degree, betweenness centrality, global and local efficiency, clustering coefficient, and the pooled model). Above-chance accuracies (permutation testing) are marked with 1, 2, and 3 dots respectively for  $p < 0.05$ ,  $p < 0.01$ , and  $p < 0.001$ . **B:** How well are different ND-CNVs classified? The plot shows the mean predicted label for each of the 42 participants with ND-CNVs across 100 cross-validation iterations using pooled node features. Participants with 22q11.2 deletions are most consistently correctly identified. Two participants with schizoaffective disorder diagnoses are marked with “S”.

## 249 Discussion

250 To our knowledge, the present study provides the first insight into oscillatory connectivity  
251 alterations in people with rare ND-CNVs. Using both an established group analysis pipeline  
252 and a data-driven graph theory framework, we uncovered a pattern of functional  
253 dysconnectivity affecting posterior regions in participants with ND-CNVs. These patterns were  
254 robust to effects of age, gender, and intracranial volume, and emerged despite a conservative  
255 thresholding approach restricted to the most reproducible connections.

256 Effects originated in low frequency bands, particularly alpha and beta, which rely on  
257 excitatory-inhibitory balance and are thought to underpin long-range communication between  
258 brain areas<sup>46</sup>. Connections linking parietal, temporal, and occipital areas were most consistently  
259 affected in both the 22q11.2 deletion group and the other ND-CNV group. Similar patterns  
260 have been previously reported in schizophrenia patients<sup>47</sup>, including alpha-band parietal  
261 hypoconnectivity in first-episode schizophrenia<sup>48</sup>. Furthermore, posterior structural network  
262 alterations have been identified as an early marker of ASD<sup>49</sup>, suggesting a link between such  
263 alterations and increased neurodevelopmental risk.

264 Similar connectivity changes in the visual processing system and the default mode network  
265 have been shown in people with 22q11.2 deletions using structural and functional MRI<sup>50-52</sup>.  
266 Here, we found that these effects are not restricted to the 22q11.2 deletion group, suggesting  
267 that long-range connectivity could act as a common marker across genetic variants. Although  
268 non-invasive measurements cannot provide direct mechanistic insight, this is consistent with  
269 alterations in excitatory-inhibitory balance as a mechanism for pleiotropic genetic effects  
270 underlying neurodevelopmental disorders<sup>53-55</sup>. This is thought to occur through increased  
271 excitation or disinhibition caused by gene haploinsufficiency and mediated by impaired GABA  
272 and NMDA receptor function<sup>56,57</sup>.

273 Despite sample size limitations, differences between the two subgroups also point to effects  
274 specific to the highly penetrant 22q11.2 deletions. Hypoconnectivity was more extensive in  
275 people with other ND-CNVs, while the 22q11.2 deletion group exhibited more focused  
276 patterns; these were robust to cohort resampling, suggesting that they are unlikely to be driven  
277 by individual cases. These differences were reflected in the graph theory analysis. Although all  
278 network features were altered in the 22q11.2 deletion group, their increased modularity was  
279 particularly discriminative, in line with previous reports of increased structural network  
280 segregation in people with 22q11.2 deletions<sup>18,22,58</sup>. For other ND-CNVs, the only predictive  
281 features were centrality measures (specifically the node eccentricity and degree), reflecting  
282 hypoconnectivity in the ND-CNV cohort. Between and within-group classification results  
283 (Supplementary Table 3) highlight the ability of graph theory metrics to capture both  
284 convergent and specific network alterations, which could help elucidate the link between CNV  
285 pathogenicity and neural system function.

286 Although the present study was able to evaluate ND-CNV effects independently of the  
287 contribution of highly penetrant 22q11.2 deletions, the limited sample size remains a concern  
288 common in CNV imaging research. The high genotype variability within the cohort makes the  
289 specificity of these effects difficult to assess, particularly with regard to differences between  
290 the 22q11.2 deletion group and other ND-CNVs. To overcome this, the generalizability of the  
291 “fingerprint” obtained by combining graph theory metrics in a machine learning framework  
292 could be verified in studies recruiting larger samples of participants with ND-CNVs, for  
293 example through large multi-site collaborations.

294 In summary, the present study assessed oscillatory long-range connectivity as a potential  
295 marker of pathogenic genetic effects across a range of rare ND-CNVs. Occipital, parietal and  
296 temporal brain areas were characterized by consistent hypoconnectivity across genotypes,  
297 which was not exclusively driven by the presence of a large number of participants with highly-  
298 penetrant 22q11.2 deletions. Functional networks in the ND-CNV group exhibited decreased  
299 node centrality and alterations in network efficiency and structure. Furthermore, features  
300 specific to highly penetrant variants were present alongside convergent network alterations and  
301 enabled successful ND-CNV classification. These results are consistent with a common  
302 mechanism for genetic risk, based on an altered balance between excitatory and inhibitory  
303 synaptic processes and leading to network dysfunction. We propose that these functional  
304 connectivity alterations are an intermediate phenotype on the pathway from synaptic molecular  
305 changes to disruption of cognitive function and psychotic illness.

## **Conflict of interest**

The authors declare no competing interests.

## **Acknowledgements**

The authors wish to thank: Ffion Evans and Kali Barawi for assistance with psychometric and clinical data collection; Eirini Messaritaki for helpful comments on the graph theory analysis; George Kirov for help with genetic data; and Alexander Shaw for the SourceMesh visualization toolbox. This work was supported by a Wellcome Trust Strategic Award (100202/Z/12/Z), the MRC UK MEG Partnership Grant (MR/K005464/1), and the MRC Doctoral Training Grant (MR/K501086/1).



## References

- 1 Kirov G, Rees E, Walters JTR, Escott-Price V, Georgieva L, Richards AL *et al.* The penetrance of copy number variations for schizophrenia and developmental delay. *Biol Psychiatry* 2014; **75**: 378–385.
- 2 Chawner SJRA, Owen MJ, Holmans P, Raymond FL, Skuse D, Hall J *et al.* Genotype-phenotype associations in children with copy number variants associated with high neuropsychiatric risk in the UK (IMAGINE-ID): a case-control cohort study. *The lancet Psychiatry* 2019; **6**: 493–505.
- 3 Niarchou M, Chawner SJRA, Doherty JL, Maillard AM, Jacquemont S, Chung WK *et al.* Psychiatric disorders in children with 16p11.2 deletion and duplication. *Transl Psychiatry* 2019; **9**: 8.
- 4 Friston K, Brown HR, Siemerikus J, Stephan KE. The dysconnection hypothesis (2016). *Schizophr Res* 2016; **176**: 83–94.
- 5 Dong D, Wang Y, Chang X, Luo C, Yao D. Dysfunction of Large-Scale Brain Networks in Schizophrenia: A Meta-analysis of Resting-State Functional Connectivity. *Schizophr Bull* 2018; **44**: 168–181.
- 6 Hull J V., Dokovna LB, Jacokes ZJ, Torgerson CM, Irimia A, Van Horn JD. Resting-State Functional Connectivity in Autism Spectrum Disorders: A Review. *Front Psychiatry* 2017; **7**: 205.
- 7 O'Reilly C, Lewis JD, Elsabbagh M. Is functional brain connectivity atypical in autism? A systematic review of EEG and MEG studies. *PLoS One* 2017; **12**: e0175870.
- 8 Sha Z, Wager TD, Mechelli A, He Y. Common Dysfunction of Large-Scale Neurocognitive Networks Across Psychiatric Disorders. *Biol Psychiatry* 2019; **85**: 379–388.
- 9 Karayiorgou M, Simon TJ, Gogos JA. 22q11.2 microdeletions: linking DNA structural variation to brain dysfunction and schizophrenia. *Nat Rev Neurosci* 2010; **11**: 402–416.
- 10 Jonas RK, Montojo CA, Bearden CE. The 22q11.2 deletion syndrome as a window into complex neuropsychiatric disorders over the lifespan. *Biol Psychiatry* 2014; **75**: 351–360.
- 11 Schneider M, Debbané M, Bassett AS, Chow EWC, Fung WLA, van den Bree MBM *et al.* Psychiatric Disorders From Childhood to Adulthood in 22q11.2 Deletion Syndrome: Results From the International Consortium on Brain and Behavior in 22q11.2 Deletion Syndrome. *Am J Psychiatry* 2014; **171**: 627–639.
- 12 Niarchou M, Zammit S, van Goozen SHM, Thapar A, Tierling HM, Owen MJ *et al.* Psychopathology and cognition in children with 22q11.2 deletion syndrome. *Br J Psychiatry* 2014; **204**: 46–54.
- 13 Owen MJ, Doherty JL. What can we learn from the high rates of schizophrenia in people with 22q11.2 deletion syndrome? *World Psychiatry* 2016; **15**: 23–5.
- 14 Zinkstok J, Amelsvoort T van. Neuropsychological Profile and Neuroimaging in Patients with 22Q11.2 Deletion Syndrome: A Review. *Child Neuropsychol* 2005; **11**: 21–37.
- 15 Boot E, van Amelsvoort TAMJ. Neuroimaging Correlates of 22q11.2 Deletion Syndrome: Implications for Schizophrenia Research. *Curr Top Med Chem* 2013; **12**: 2303–2313.
- 16 Reddaway JT, Doherty JL, Lancaster T, Linden D, Walters JT, Hall J. Genomic and Imaging Biomarkers in Schizophrenia. *Curr Top Behav Neurosci* 2018; **40**: 325–352.
- 17 Sun D, Ching CRK, Lin A, Forsyth JK, Kushan L, Vajdi A *et al.* Large-scale mapping of cortical alterations in 22q11.2 deletion syndrome: Convergence with idiopathic psychosis and effects of deletion size. *Mol Psychiatry* 2018; : 1–13.

- 18 Ottet M-C, Schaer M, Debbané M, Cammoun L, Thiran J-P, Eliez S. Graph theory reveals dysconnected hubs in 22q11DS and altered nodal efficiency in patients with hallucinations. *Front Hum Neurosci* 2013; **7**: 402.
- 19 Villalón-Reina JE, Martínez K, Qu X, Ching CRK, Nir TM, Kothapalli D *et al.* Altered white matter microstructure in 22q11.2 deletion syndrome : a multisite diffusion tensor imaging study. *Mol Psychiatry* 2019.
- 20 Debbané M, Lazouret M, Lagioia A, Schneider M, Van De Ville D, Eliez S. Resting-state networks in adolescents with 22q11.2 deletion syndrome: Associations with prodromal symptoms and executive functions. *Schizophr Res* 2012; **139**: 33–39.
- 21 Padula MC, Schaer M, Scariati E, Schneider M, Van De Ville D, Debbané M *et al.* Structural and functional connectivity in the default mode network in 22q11.2 deletion syndrome. *J Neurodev Disord* 2015; **7**: 23.
- 22 Scariati E, Schaer M, Karahanoglu I, Schneider M, Richiardi J, Debbané M *et al.* Large-scale functional network reorganization in 22q11.2 deletion syndrome revealed by modularity analysis. *Cortex* 2016; **82**: 86–99.
- 23 Tomescu MI, Rihs TA, Becker R, Britz J, Custo A, Grouiller F *et al.* Deviant dynamics of EEG resting state pattern in 22q11.2 deletion syndrome adolescents: A vulnerability marker of schizophrenia? *Schizophr Res* 2014; **157**: 175–181.
- 24 Berman JI, Chudnovskaya D, Blaskey L, Kuschner E, Mukherjee P, Buckner R *et al.* Relationship between M100 Auditory Evoked Response and Auditory Radiation Microstructure in 16p11.2 Deletion and Duplication Carriers. *AJNR Am J Neuroradiol* 2016; **37**: 1178–84.
- 25 Drakesmith M, Parker GD, Smith J, Linden SC, Rees E, Williams N *et al.* Genetic risk for schizophrenia and developmental delay is associated with shape and microstructure of midline white-matter structures. *Transl Psychiatry* 2019; **9**: 102.
- 26 Silva AI, Ulfarsson MO, Stefansson H, Gustafsson O, Walters GB, Linden DEJ *et al.* Reciprocal White Matter Changes Associated With Copy Number Variation at 15q11.2 BP1-BP2: A Diffusion Tensor Imaging Study. *Biol Psychiatry* 2019; **85**: 563–572.
- 27 Frohlich J, Senturk D, Saravanapandian V, Golshani P, Reiter LT, Sankar R *et al.* A Quantitative Electrophysiological Biomarker of Duplication 15q11.2-q13.1 Syndrome. *PLoS One* 2016; **11**: e0167179.
- 28 Frohlich J, Reiter LT, Saravanapandian V, DiStefano C, Huberty S, Hyde C *et al.* Mechanisms underlying the EEG biomarker in Dup15q syndrome. *Mol Autism* 2019; **10**: 29.
- 29 Hinkley LBN, Dale C, Luks TL, Findlay AM, Bukshpun P, Pojman N *et al.* Sensorimotor cortical oscillations during movement preparation in 16p11.2 deletion carriers. *J Neurosci* 2019; : 3001–17.
- 30 Jenkins J, Chow V, Blaskey L, Kuschner E, Qasmieh S, Gaetz L *et al.* Auditory Evoked M100 Response Latency is Delayed in Children with 16p11.2 Deletion but not 16p11.2 Duplication. *Cereb Cortex* 2016; **26**: 1957–1964.
- 31 Vrba J. Magnetoencephalography: The art of finding a needle in a haystack. *Phys C Supercond its Appl* 2002; **368**: 1–9.
- 32 Oostenveld R, Fries P, Maris E, Schoffelen JM. FieldTrip: Open source software for advanced analysis of MEG, EEG, and invasive electrophysiological data. *Comput Intell Neurosci* 2011; **2011**: 156869.
- 33 Colclough GL, Woolrich MW, Tewarie PK, Brookes MJ, Quinn AJ, Smith SM. How reliable are MEG resting-state connectivity metrics ? *Neuroimage* 2016; **138**: 284–293.

- 34 Huang MX, Mosher JC, Leahy RM. A sensor-weighted overlapping-sphere head model and exhaustive head model comparison for MEG. *Phys Med Biol* 1999; **44**: 423–440.
- 35 Hillebrand A, Barnes GR, Bosboom JL, Berendse HW, Stam CJ. Frequency-dependent functional connectivity within resting-state networks : An atlas-based MEG beamformer solution. *Neuroimage* 2012; **59**: 3909–3921.
- 36 Tzourio-Mazoyer N, Landeau B, Papathanassiou D, Crivello F, Etard O, Delcroix N *et al.* Automated Anatomical Labeling of Activations in SPM Using a Macroscopic Anatomical Parcellation of the MNI MRI Single-Subject Brain. *Neuroimage* 2002; **15**: 273–289.
- 37 Colclough GL, Brookes MJ, Smith SM, Woolrich MW. A symmetric multivariate leakage correction for MEG connectomes. *Neuroimage* 2015; **117**: 439–448.
- 38 Siems M, Pape A-A, Hipp JF, Siegel M. Measuring the cortical correlation structure of spontaneous oscillatory activity with EEG and MEG. *Neuroimage* 2016; **129**: 345–355.
- 39 Hu M-L, Zong X-F, Mann JJ, Zheng J-J, Liao Y-H, Li Z-C *et al.* A Review of the Functional and Anatomical Default Mode Network in Schizophrenia. *Neurosci Bull* 2017; **33**: 73–84.
- 40 Søndery IE, Gústafsson Ó, Doan NT, Hibar DP, Martin-Brevet S, Abdellaoui A *et al.* Dose response of the 16p11.2 distal copy number variant on intracranial volume and basal ganglia. *Mol Psychiatry* 2018. doi:10.1038/s41380-018-0118-1.
- 41 Warland A, Kendall KM, Rees E, Kirov G, Caseras X. Schizophrenia-associated genomic copy number variants and subcortical brain volumes in the UK Biobank. *Mol Psychiatry* 2019; : 1.
- 42 Koelewijn L, Lancaster TM, Linden D, Dima DC, Routley BC, Magazzini L *et al.* Oscillatory hyperactivity and hyperconnectivity in young APOE-ε4 carriers and hypoconnectivity in Alzheimer’s disease. *Elife* 2019; **8**: 1–25.
- 43 Nichols TE, Holmes AP. Nonparametric Permutation Tests For Functional Neuroimaging : A Primer with Examples. *Hum Brain Mapp* 2001; **25**: 1–25.
- 44 Rubinov M, Sporns O. Complex network measures of brain connectivity: Uses and interpretations. *Neuroimage* 2010; **52**: 1059–1069.
- 45 Boser BE, Guyon IM, Vapnik VN. A training algorithm for optimal margin classifiers. In: *Proceedings of the fifth annual workshop on Computational learning theory - COLT '92*. ACM Press: New York, New York, USA, 1992, pp 144–152.
- 46 Schnitzler A, Gross J. Normal and pathological oscillatory communication in the brain. *Nat Rev Neurosci* 2005; **6**: 285–296.
- 47 Brookes MJ, Tewarie PK, Hunt BAE, Robson SE, Gascoyne LE, Liddle EB *et al.* A multi-layer network approach to MEG connectivity analysis. *Neuroimage* 2016; **132**: 425–438.
- 48 Phalen H, Coffman BA, Ghuman A, Sejdić E, Salisbury DF. Non-Negative Matrix Factorization Reveals Resting-State Cortical Alpha Network Abnormalities in the First Episode Schizophrenia-Spectrum. *Biol Psychiatry Cogn Neurosci Neuroimaging* 2019.
- 49 Lewis JD, Evans AC, Pruett JR, Botteron K, Zwaigenbaum L, Estes A *et al.* Network inefficiencies in autism spectrum disorder at 24 months. *Transl Psychiatry* 2014; **4**: e388–e388.
- 50 Scariati E, Padula MC, Schaer M, Eliez S. Long-range dysconnectivity in frontal and midline structures is associated to psychosis in 22q11.2 deletion syndrome. *J Neural Transm* 2016; **123**: 823–839.
- 51 Schreiner MJ, Karlsgodt KH, Uddin LQ, Chow C, Congdon E, Jalbrzikowski M *et al.* Default mode network connectivity and reciprocal social behavior in 22q11.2 deletion syndrome. *Soc*

- Cogn Affect Neurosci* 2014; **9**: 1261–1267.
- 52 Larsen KM, Dzafic I, Siebner HR, Garrido MI. Alteration of functional brain architecture in 22q11.2 deletion syndrome – Insights into susceptibility for psychosis. *Neuroimage* 2019; **190**: 154–171.
- 53 Gao R, Penzes P. Common mechanisms of excitatory and inhibitory imbalance in schizophrenia and autism spectrum disorders. *Curr Mol Med* 2015; **15**: 146–67.
- 54 Lee E, Lee J, Kim E. Excitation/Inhibition Imbalance in Animal Models of Autism Spectrum Disorders. *Biol Psychiatry* 2017; **81**: 838–847.
- 55 Foss-Feig JH, Adkinson BD, Ji JL, Yang G, Srihari VH, McPartland JC *et al.* Searching for Cross-Diagnostic Convergence: Neural Mechanisms Governing Excitation and Inhibition Balance in Schizophrenia and Autism Spectrum Disorders. *Biol Psychiatry* 2017; **81**: 848–861.
- 56 Kehrer C, Maziashvili N, Dugladze T, Gloveli T. Altered excitatory-inhibitory balance in the NMDA-hypofunction model of schizophrenia. *Front Mol Neurosci* 2008; **1**: 6.
- 57 Ramamoorthi K, Lin Y. The contribution of GABAergic dysfunction to neurodevelopmental disorders. *Trends Mol Med* 2011; **17**: 452–462.
- 58 Sandini C, Scariati E, Padula MC, Schneider M, Schaer M, Van De Ville D *et al.* Cortical Dysconnectivity Measured by Structural Covariance Is Associated With the Presence of Psychotic Symptoms in 22q11.2 Deletion Syndrome. *Biol Psychiatry Cogn Neurosci Neuroimaging* 2018; **3**: 433–442.
